# Supplementary material for: Characteristics of Corneal Morphology and Biomechanics in Children with Allergic Conjunctivitis and Association with Eye-Rubbing
Source: Research Square preprint supplement (doi:10.21203/rs.3.rs-6772194/v1), 2025-09-11
Supplement: Supplementary file 1 [file 1e88975112cfecdac233defb.docx]

|  | AC（n=66） | nAC（n=20） | T/χ2 | *P* |
| --- | --- | --- | --- | --- |
| Age | 10.6±1.79 | 11.3±2.72 | -0.393 | 0.167 |
| Sex，male，n（%） | 54（81.8%） | 13（65%） | 2.522 | 0.112 |
| IOP（mmHg） | 14.5±3.64 | 14.2±2.98 | 0.327 | 0.745 |
| spherical equivalent（SE） | -1.625±0.570 | -1.400±0.459 | -1.227 | 0.228 |

Table1 Demographics of AC group and control group
