# Supplementary material for: Characteristics of Corneal Morphology and Biomechanics in Children with Allergic Conjunctivitis and Association with Eye-Rubbing
Source: Research Square preprint supplement (doi:10.21203/rs.3.rs-6772194/v1), 2025-09-11
Supplement: Supplementary file 2 [file 36da746ac3799ba643530078.docx]

|  | AC（n=66） | nAC（n=20） | *T/Z* | *P* |
| --- | --- | --- | --- | --- |
| CCT | 558.58±34.60 | 565.70±17.51 | -1.23 | 0.223 |
| Kf | 42.04±1.26 | 42.48±1.54 | -1.30 | 0.199 |
| Ks | 43.31±1.52 | 43.97±1.72 | -1.65 | 0.103 |
| Km | 42.66±1.37 | 43.22±1.58 | -1.53 | 0.129 |
| Kmax | 43.89±1.56 | 44.60±1.73 | -1.73 | 0.087 |
| front elevation | 4.83±2.66 | 3.10±1.33 | 3.92 | 0.000 |
| back elevation | 7.24±3.53 | 7.35±3.95 | -0.12 | 0.908 |
| Df* | 1.87(0.94, 2.37) | 0.85(0.53, 1.46) | -3.21 | 0.001 |
| Db* | -0.08(-0.80, 1.03) | 0.31(-0.14, 0.89) | -0.89 | 0.374 |
| Dp* | 0.78(0.51, 1.41) | 0.58(0.01, 1.17) | -1.76 | 0.079 |
| Dt* | -0.17(-0.72, 0.64) | -0.50(-0.92, 0.02) | -1.42 | 0.155 |
| Da* | 0.50(0.11, 0.93) | 0.38(-0.14, 0.58) | -1.67 | 0.096 |
| BAD-D | 1.05±0.61 | 0.89±0.67 | 0.97 | 0.336 |
| ISV | 24.91±17.37 | 21.85±7.14 | 0.77 | 0.446 |
| IVA | 0.17±0.15 | 0.24±0.35 | -0.80 | 0.434 |
| KI | 1.03±0.03 | 1.04±0.03 | -0.97 | 0.335 |
| CKI | 1.01±0.01 | 1.01±0.00 | 1.39 | 0.170 |
| IHA | 5.58±4.96 | 7.01±6.29 | -1.05 | 0.296 |
| IHD | 0.04±0.16 | 0.01±0.01 | 0.87 | 0.389 |

Table 2. Comparison of corneal topographic parameters between AC patients and the normal control group.

* For non-normally distributed data, continuous variables are presented as median and interquartile range (IQR), and between-group comparisons were performed using the Mann-Whitney U test.
