# Supplementary material for: Characteristics of Corneal Morphology and Biomechanics in Children with Allergic Conjunctivitis and Association with Eye-Rubbing
Source: Research Square preprint supplement (doi:10.21203/rs.3.rs-6772194/v1), 2025-09-11
Supplement: Supplementary file 3 [file be6275366ac1c7e3a860439c.docx]

|  | AC（n=66） | nAC（n=20） | *T/Z* | *P* |
| --- | --- | --- | --- | --- |
| IOP | 14.53±3.64 | 14.61±2.96 | -0.07 | 0.944 |
| b-IOP | 14.42±3.03 | 14.34±2.52 | 0.09 | 0.933 |
| B-CCT | 563.40±26.77 | 549.17±10.62 | 3.08 | 0.004 |
| A1 time | 7.45±0.60 | 7.67±0.72 | -1.26 | 0.218 |
| A1 velocity | 0.12±0.02 | 0.12±0.01 | 0.61 | 0.541 |
| A1 length | 2.21±0.29 | 2.42±0.22 | -3.49 | 0.001 |
| A2 time | 22.37±0.58 | 22.20±0.99 | 0.74 | 0.464 |
| A2 velocity | -0.26±0.04 | -0.23±0.04 | -2.18 | 0.062 |
| A2 length | 1.90±0.35 | 1.99±0.58 | -0.61 | 0.545 |
| DA | 1.00±0.13 | 0.97±0.11 | 1.02 | 0.313 |
| HCT | 17.43±0.54 | 17.63±0.49 | -1.31 | 0.194 |
| PD | 4.86±0.32 | 4.75±0.30 | 1.32 | 0.192 |
| HC radius | 6.81±0.73 | 7.08±1.06 | -0.96 | 0.347 |
| max DAratio (2 mm) | 4.30±0.50 | 4.17±0.52 | 0.93 | 0.356 |
| ARTh | 515.35±73.66 | 516.80±90.26 | -0.07 | 0.942 |
| SP-A1 | 113.64±20.98 | 124.54±8.56 | -3.39 | 0.001 |
| CBI | 0.00(0.00, 0.05) | 0.00(0.00, 0.03) | -0.40 | 0.689 |
| TBI | 0.27(0.11, 0.43) | 0.34(0.09, 0.51) | -0.26 | 0.798 |

Table 3 Comparison of corneal biomechanical parameters between AC patients and the normal control group.

* For non-normally distributed data, continuous variables are presented as median and interquartile range (IQR), and between-group comparisons were performed using the Mann-Whitney U test.
